# Supplementary material
Source: Springer Nature journal article supplement (https://www.springermedizin.de/resource/supplementary/13069_2008_5_MOESM16_ESM.pdf/9659588)

**1) HEPATOCYTE (HC)** - primary target for several agents/conditions able to induce cell injury and death

- most of agents/conditions leading to HC injury are able to generate ROS, HNE, and other free radicals
- damaged HC can release ROS and other reactive intermediates in the surrounding microenvironment
- HC can also release IGF-1 and, under hypoxia, VEGF
- during chronic liver diseases, surviving HC can proliferate in an attempt to repopulate injured liver

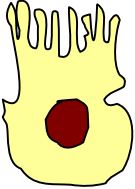

**2) MONONUCLEAR CELLS (Mc) KUPFFER CELLS (KC)**

- recruited Mc and resident KC become activated in conditions of chronic liver injury
- Mc and KC can act by phagocytosis of cell debris & apoptotic bodies as well as APC
- on activation, they can generate and release: ROS and other reactive intermediates; several GFs, CKs & mediators, including PDGF, bFGF, TGF $\beta$ , TNF $\alpha$ , IL-1, PGs, etc; selected MMPs



**3) SINUSOIDAL ENDOTHELIAL CELLS (SEC)**

- participate to angiogenesis, being recruited and stimulated by GFs, mainly VEGF
- when injured/activated, SEC can potentially release: GFs & CKs like PDGF, bFGF, IL-1, TGF $\beta$ , IGF-1, PGs, ETs, VEGF; NO and ROS



**4) PLATELETS**

- when recruited/activated at the site of injury they can release: PDGF, EGF, TGF $\alpha$ , TGF $\beta$ , TXAs, IGF-1

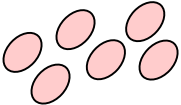

**5) T LYMPHOCYTES**

- recruited to the liver under conditions of chronic liver injury induced by viruses (HBV, HCV), chronic alcohol consumption, auto-immune conditions, etc.
- may contribute to perpetuation of liver injury
- once activated, may release TNF $\alpha$  or IFN $\gamma$  as well as other CKs

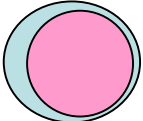

**6) HEPATIC PROGENITOR CELLS (HPC)**

- under certain conditions (i.e. chronic liver injury) may contribute to parenchymal repopulation
- HPC are bipotent cells, able to give rise to either HC or biliary epithelial cells (BEC)

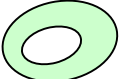

**7) BILIARY EPITHELIAL CELLS (BEC)**

- BEC can actively proliferate in different conditions of acute & chronic liver injury
- BEC can establish cross-talks with surrounding cells and may release a number of mediators, including PDGF, TGF $\beta$  II, ETs and VEGF



**8) ENDOTHELIAL PROGENITOR CELLS (EPC)**

- circulating and/or bone marrow (BM) derived cells that may contribute to liver angiogenesis, possibly together with BM - derived monocyte lineage cells



Supplement: MOESM16 [file 9659588]
